# Supplementary material
Source: publisher figshare collection journal article supplement (https://brill.figshare.com/articles/dataset/_/20035883)
Supplement: Supplementary file 1 [file 1]

## Sheet: Sheet1
Species	ID	Body mass (kg)	Body mass (g)	Log (BM g)	bird or mammal?	Sex	Age (years)	DOB	MLSP (years)	Age/MLSP	PK activity (nmol/min/ml)	LDH activity (nmol/min/ml)
Yellow crowned Amazon parrot	Rex	0.63	630	2.79934	Bird	MI	39		56	0.696429	42.375	2050.56
Bald Eagle	Archie	4.04	4040	3.60638	Bird	FI	18		48	0.375		6669.44
Bald Eagle	Betty White	4.69	4690	3.67117	Bird	FI	7		48	0.145833	11.3309	7573.89
Bald Eagle	Chatty Cathy	4.28	4280	3.63144	Bird	FI	7		48	0.145833	9.76471	7769.44
Bald Eagle	Reggie	3.58	3580	3.55388	Bird	MI	7		48	0.145833	11	6606.67
Bald Eagle	Sam	3.05	3050	3.4843	Bird	MI	15		48	0.3125	9.13235	4257.78
Barred Owl	211095	0.838	838	2.92324	Bird	U	6		24	0.25	64.4538	10231.1
Bateleur eagle	899334	2.42	2420	3.38382	Bird	F			55		35.2647	2534.44
Blue Bellied Roller	217028	0.13	130	2.11394	Bird	F	1				36.1176	4350.55
Brush Turkey	213079	2.68	2680	3.42813	Bird	M	12		12.5	0.96	29.9385	7940.74
Chilean Flamingo	Flamingo 78	2.6	2600	3.41497	Bird	FI	19		36.7	0.517711	16.3235	1357.78
Chilean Flamingo	Flamingo 84	2.95	2950	3.46982	Bird	MI	19		36.7	0.517711	21.8382	1271.67
Chilean Flamingo	20317	1.9	1900	3.27875	Bird	male	46	1972	36.7	1.25341	56.6838	5942.19
Chilean Flamingo	20349	2.95	2950	3.46982	Bird	male	37	1981	36.7	1.00817	90.4779
Chilean Flamingo	20350	1.9	1900	3.27875	Bird	female	37	1981	36.7	1.00817	69.6691	5585.16
Chilean Flamingo	22099	2.45	2450	3.38917	Bird	female	23	1995	36.7	0.626703	88.3015	13031.8
Chilean Flamingo	23293	2.55	2550	3.40654	Bird	male	12	2006	36.7	0.326975	68.7647	5747.38
Chilean Flamingo	23833	3.25	3250	3.51188	Bird	male	31	1987	36.7	0.844687	54.0882
Chilean Flamingo	23835	2.45	2450	3.38917	Bird	female	31	1987	36.7	0.844687	98.6471	4959.23
Cinereous Vulture	2251	9.84	9840	3.993	Bird	F	29		39	0.74359	15.9118	11517.2
Common Peafowl	#2617	4.5	4500	3.65321	Bird	Male	5	2013-06-01	23.2	0.215517	30.8235	14126.1
Common Peafowl	#2620	4	4000	3.60206	Bird	Male	5	2013-06-01	23.2	0.215517	46.6029	9905
Domestic Rooster	Cluck	1.7	1700	3.23045	Bird	MI	5		30	0.166667	10.4338	10848.3
Eastern Screech Owl	206088	0.151	151	2.17898	Bird	F	12		20.7	0.57971	174.279	2145.78
Eastern Screech Owl	Zeppelin	0.165	165	2.21748	Bird	MI	3		20.7	0.144928	32.2574	8640
Golden Eagle	Aquila	4.5	4500	3.65321	Bird	FI	12		48	0.25	12.9632	9269.44
Great Horned Owl	Sherlock	1.4	1400	3.14613	Bird	MI	7.5		29	0.258621	24.6029	9498.33
Great Horned Owl	Stella	1.35	1350	3.13033	Bird	FI	8.5		29	0.293103	30.3382	19369.4
Kori Bustard	#2528	7.5	7500	3.87506	Bird	Female	9	2009-08-05			29.7426	8908.89
Muscovy Duck	Mr. Wilson	4.51	4510	3.65418	Bird	MI	10				32.1769	5789.63
Ostrich	22736	136.3	136300	5.1345	Bird	female	17	2001-07-22	50	0.34	54.0368	20617
Ostrich	22737	128.2	128200	5.10789	Bird	female	17	2001-07-22	50	0.34	29.2279	15700
Ostrich	22862	120	120000	5.07918	Bird	female	16	2002-07-15	50	0.32	71.6103	27349.6
Palm cockatoo	312354	0.569	569	2.75511	Bird	F	12	2006-06-07	56.3	0.213144	21.2426	1782.78
Red-tailed Hawk	Hunter	1.74	1740	3.24055	Bird	FI	14.5		30.7	0.472313	6.88236	4605.56
Red-tailed Hawk	Wendy	1.6	1600	3.20412	Bird	FI	7.5		30.7	0.2443	3.54412	9406.67
Saddlebill stork	23702	4.25	4250	3.62839	Bird	female	24	1994	30.2	0.794702	118.507	3446.22
Saddlebill stork	24033	6.3	6300	3.79934	Bird	male	11	2007	30.2	0.364238	96.2647	3233.33
Sandhill Crane	Sandy	4.34	4340	3.63749	Bird	M	10		36.6	0.273224	57.7574	5678.33
Souther screamer	314303	3.35	3350	3.52504	Bird	M	4	2014-04-11			25.7353	4028.89
Stanley Blue Crane	213022	4.32	4320	3.63548	Bird	F	8				30.7346	8053.33
Turkey Vulture	Stan	2.04	2040	3.30963	Bird	FI	13		20.8	0.625	19.3088	8505.56
Victoria crowned Pigeon	205044	2.94	2940	3.46835	Bird	M	14				58.1397	760.889
Victoria crowned Pigeon	B02067	2.01	2010	3.3032	Bird	F	19				106.985	591.112
Wattled crane	21634	6.7	6700	3.82607	Bird	male	35	1983-05-28			31.3529
West African Crowned Crane	208010	2.9	2900	3.4624	Bird	F	10					10989.6
White Stork	205004	3.06	3060	3.48572	Bird	F	25		39	0.641026	26.0147	9088.33
White Stork	207006	3.86	3860	3.58659	Bird	M	20		39	0.512821	89.1077	7057.78
Rock pigeon	RKPG27	0.301	301	2.47857	Bird	n/a					226.008	126.666
Rock pigeon	RKPG28	0.336	336	2.52634	Bird	n/a					243.223	5474.08
Rock pigeon	RKPG29	0.265	265	2.42325	Bird	n/a					208.208	33822.2
										Average	56.6979	8087.83
										SEM	7.96059	950.639
Addax	#2750	125	125000	5.09691	Mammal	Female	13	2005-05-21	28	0.464286	70.875	5956.89
Addax	#2752	120	120000	5.07918	Mammal	Female	8	2010-06-16	28	0.285714		864.89
Addax	#3028	110	110000	5.04139	Mammal	Female	2	2016-05-17	28	0.0714286	60.8015	6939.11
Addra gazelle	2119	40	40000	4.60206	Mammal	female	3	2015-04-12	19.3	0.15544	87.7206	10486.7
African Lion	#2997	178	178000	5.25042	Mammal	Female	8	2010-08-31	27	0.296296	66.7426	4076
African Lion	#3071	11.1	11100	4.04532	Mammal	Male	1	2017-11-14	27	0.037037	40.8088	519.111
African Lion	#2501	212.3	212300	5.32695	Mammal	Male	1	2018-12-18	27	0.037037	29.6103	9361.78
African Lion	#2998	161.9	161900	5.20925	Mammal	Female	8	2010-08-31	27	0.296296	47.5809	3956.89
Arctic Fox	513166	5.9	5900	3.77085	Mammal	M	7	2011-05-13	16.3	0.429448	10.9559	2000
Arctic fox	513167	4.5	8.66	0.937518	Mammal	F			16.3		2.0147	1579.44
Black Footed Cat	115012	1.92	1920	3.2833	Mammal	M	8		15.6	0.512821	19.0769	9148.89
Black Footed Cat	115013	1.67	1670	3.22272	Mammal	F	11		15.6	0.705128	44.5385	3288.15
Bobcat	Moose	12.3	12300	4.08991	Mammal	MI	10		32.3	0.309598	1.36029	1778.33
Bobcat	Squeakers	9.91	9910	3.99607	Mammal	FS	12		32.3	0.371517	4.51471	3008
Bobcat		8.9	8900	3.94939	Mammal		13		32.3	0.402477	74.9265	9680
Bonobo	174013	37.5	37500	4.57403	Mammal	F	44	1974-01-22	55	0.8	18.2206	5127.78
Bonobo	691777	49.5	49500	4.69461	Mammal	M	27	1991-12-23	55	0.490909	30.1765	4258.89
Capybara	508143	45.5	45500	4.65801	Mammal	F	10	2008-01-01	15.1	0.662252	34.4706	451.111
Chimp	407	50	50000	4.69897	Mammal	female	35	1983-12-24	59.4	0.589226	14.7647	5260.71
Chimp	1401	52.3	52300	4.7185	Mammal	female	22	1996-12-16	59.4	0.37037	21.6103	6575.53
Chimp	1830	32.7	32700	4.51455	Mammal	female	6	2012-01-16	59.4	0.10101	26.0662	5194.04
Chimp	1972	31	31000	4.49136	Mammal	female	7	2011-04-17	59.4	0.117845	9.88971	6753.3
Domestic cat	W10	3.24	3240	3.51055	Mammal	F	4		30	0.133333	88.3971	9794.79
Domestic cat	W11	5.625	5625	3.75012	Mammal	M	3		30	0.1	84.0441	25214.8
Domestic cat	W14	4.05	4050	3.60746	Mammal	M	5.5		30	0.183333	65.8088	15134
Domestic cat	W23	3.15	3150	3.49831	Mammal	F	4		39	0.102564	30.6324	13867.4
Domestic cat	W24	3.15	3150	3.49831	Mammal	F	1		30	0.0333333	29.6544	23720
Domestic Ferret	Freddy	1.075	1075	3.03141	Mammal	MN	5		11.1	0.45045	18.0147	2590.56
Donkey	Norbert	113.4	113400	5.05461	Mammal	M			47		18.6985	6068.89
Donkey	Stanley	58.96	58960	4.77056	Mammal	M	1	2017-08-01	47	0.0212766	21.3088	4437.78
Donkey	Otto	88.9	88900	4.9489	Mammal	M	3	2015-07-01	47	0.0638298	30.0692	11260.7
Miniature Donkey	Jenny	134	134000	5.1271	Mammal	FI	18.5		47	0.393617	11.4559	4340.56
Flemish Giant Rabbit	Jack	7.5	7500	3.87506	Mammal	MN	4.5		9	0.5	19.875	1092.78
Francois' langur	512005	10.04	10040	4.00173	Mammal	F	16	2002-09-02	26.3	0.608365	22.5221	1682.78
Francois' langur	512178	8.94	8940	3.95134	Mammal	F	6	2012-11-03	26.3	0.228137	49.9118	2892.78
Slender horned Gazelle	#3004	13.6	13600	4.13354	Mammal	Female	7	2011-04-28	14.6	0.479452	19.9375	8529.44
Giraffe	#1292	700	700000	5.8451	Mammal	Female	21	1997-08-24	39.5	0.531646	90.0809	2458.89
Giraffe	107006	1067	1067000	6.02816	Mammal	M	12		39.5	0.303797	20.3235	3427.78
Goat	#2222	43	43000	4.63347	Mammal	Male	8	2010-05-20	20.8	0.384615	81.7794	3230.67
Goat	#2225	40	40000	4.60206	Mammal	Female	11	2007-08-17	20.8	0.528846	75.4559	3527.56
Goat	#2544	32.85	32850	4.51654	Mammal	Female	5	2013-04-24	20.8	0.240385	60.7132	2420
Goat	#2545	38	38000	4.57978	Mammal	Female	5	2013-04-24	20.8	0.240385	38.0147	736.89
Goat	#2941	30.5	30500	4.4843	Mammal	Female	4	2014-04-24	20.8	0.192308	63.8088	3260
Goat	#2992	25	25000	4.39794	Mammal	Female	2	2016-04-27	20.8	0.0961538	71.4044	3970.22
Pygmy goat	Opal	31.6	31600	4.49969	Mammal	FI	5.5		20.8	0.264423	54.6618	4658.33
Pygmy goat	Candy	30	30000	4.47712	Mammal	Female	12		20.8	0.576923	17.2059	2832.22
Golden headed lion tamarin	#2040	0.78	780	2.89209	Mammal	Male	17	2001-11-18	31.6	0.537975	14.0074	8450
Golden headed lion tamarin	#2803	0.79	790	2.89763	Mammal	Female	6	2012-11-22	31.6	0.189873	46.875	8008.89
Greater kudu	2130	150	150000	5.17609	Mammal	female	2	2016-09-07	23.5	0.0851064		4214.67
Greater kudu	2138	130	130000	5.11394	Mammal	male	2	2016-10-14	23.5	0.0851064	131.596	12810.3
Greater kudu	2193	70	70000	4.8451	Mammal	male	1	2017-10-11	23.5	0.0425532	45.1618	7356.11
Hamadryas Baboon	1502	28	28000	4.44716	Mammal	male	20	1998-10-20	37.5	0.533333		12218.5
Hamadryas Baboon	1664	16.5	16500	4.21748	Mammal	female	14	2004-09-13	37.5	0.373333	64.0368	3714.78
Hamadryas Baboon	1724	29.5	29500	4.46982	Mammal	male	13	2005-10-08	37.5	0.346667	36.9559	5761.45
Hamadryas Baboon	1875	13	13000	4.11394	Mammal	female	8	2010-10-01	37.5	0.213333	28.7647	1722.93
Hamadryas Baboon	1983	12	12000	4.07918	Mammal	male	5	2013-05-21	37.5	0.133333	74.8971	4766.64
Hamadryas Baboon	2090	6	6000	3.77815	Mammal	male	3	2015-09-25	37.5	0.08	49.4044	3050.34
Holstein cow		635	635000	5.80277	Mammal	Female	5		20	0.25	52.4853	9780
Horse	Huckelberry	453.59	453590	5.65666	Mammal	M	10	2008	57	0.175439	70.6538	14071.1
Horse	Hank	453.59	453590	5.65666	Mammal	M	12	2006	57	0.210526	46.0923	9555.56
Jacob Sheep	Donegal	71.27	71270	4.85291	Mammal	MN	9		22.8	0.394737	16.5294	4245.56
Jacob Sheep	Honky Tonk	66.32	66320	4.82164	Mammal	MN	7		22.8	0.307018	33.0515	4280.56
Jacob Sheep	Mercutio	84.86	84860	4.9287	Mammal	MN	8		22.8	0.350877	22.4118	4238.89
Jacob Sheep	Twang	72.7	72700	4.86153	Mammal	MN	7.5		22.8	0.328947	25.75	4494.44
Koala	508111	5.76	5760	3.76042	Mammal	F	10	2008-03-24	22.1	0.452489	46.0294	1605
Llama	#1517	145	145000	5.16137	Mammal	Female	17	2001-05-13	28.9	0.588235	57.5294	6911.67
Llama	#2229	127.5	127500	5.10551	Mammal	Female	8	2010-07-01	28.9	0.276817	52.0368	6445
North American Porcupine	Khaleesi	10.05	10050	4.00217	Mammal	FI	3		23.4	0.128205	26.2353	5113.33
North American River Otter	Rocky	8.6	8600	3.9345	Mammal	MI	13		27	0.481481		4816
North American River Otter	Clarke	10.13	10130	4.00561	Mammal	M	9		27	0.333333	1.10294	278.222
North American River Otter		7	7000	3.8451	Mammal		9		27	0.333333	60.8088	2300
North American River Otter	#1815	9.4	9400	3.97313	Mammal	Male	12	2006-03-01	27	0.444444	1.20586
Nyala	#3025	118	118000	5.07188	Mammal	Male	10	2008-07-08	18.5	0.540541	129.86	6737.22
Prehensile Tailed Porcupine	Prickles	5.9	5900	3.77085	Mammal	FS	8		26.6	0.300752	31.9632	8340.89
Prehensile Tailed Porcupine	Finnegan	6.86	6860	3.83632	Mammal	MI	8.5		26.6	0.319549		4877.33
Red Fox	#2570	4.7	4700	3.6721	Mammal	Female	3	2015-02-15	21.3	0.140845		1332.22
Red Panda	Amaya	5.05	5050	3.70329	Mammal	FI	9.5		19	0.5	32.5074	9041.78
Red Panda	Slash	5.45	5450	3.7364	Mammal	MI	3.5		19	0.184211		3497.33
Red Panda	Gansu	4.26	4260	3.62941	Mammal	F	4		19	0.210526	60.8529	4592.89
Red Panda	Mohu	6.34	6340	3.80209	Mammal	F	4		19	0.210526	29.6544	7168
Red Panda	#2651	6.88	6880	3.83759	Mammal	Female	5	2013-02-16	19	0.263158	43.7353	9507.56
Red River Hog	107002	79	79000	4.89763	Mammal	F	11		22	0.5	2.42647	7834.22
Red River Hog	107003	63	63000	4.79934	Mammal	F	11		22	0.5	25.2059	8026.67
Red River Hog	1737	60	60000	4.77815	Mammal	female	14	2004-10-18	22	0.636364	13.4853	8030.67
Red River Hog	1738	70	70000	4.8451	Mammal	Male	18	2000-05-06	22	0.818182	8.39706	6552.78
Royal Antelope	513137	2	2000	3.30103	Mammal	M			22		101.529	3347.78
Serval	515054	10.07	10070	4.00303	Mammal	M	3	2015-05-13	22.4	0.133929	14.6912	643.333
Siberian musk deer	516052	10	10000	4	Mammal	M	2	2016-06-03			100.809	6627.22
Sitatunga	1934	75	75000	4.87506	Mammal	female	6	2012-04-16	22.6	0.265487	43.3529	9689.6
Sitatunga	2039	50	50000	4.69897	Mammal	female	4	2014-08-08	22.6	0.176991	62.5294	11315.5
Sitatunga	2051	40	40000	4.60206	Mammal	female	4	2014-10-08	22.6	0.176991	50.375	5497.01
Sitatunga	2071	75	75000	4.87506	Mammal	male	3	2015-04-24	22.6	0.132743	106.61	10360.7
South African vervet	517004	3.06	3060	3.48572	Mammal	M	1	2018-09-20			31.0662	3656.11
Southern Gerenuk	616508	27.6	27600	4.44091	Mammal	M	2	2016-07-30	17.3	0.115607	25.3971	6575
Spectacled bear	513050	128.9	128900	5.11025	Mammal	M	8	2010-12-30	39	0.205128	6.54412	3153.33
Black-handed Spider Monkey	2023	6.43	6430	3.80821	Mammal	F	28		47.1	0.59448		6318.89
Black-handed Spider Monkey	97M006	6.19	6190	3.79169	Mammal	F	21		47.1	0.44586	28.3382	4912.56
Black-handed Spider Monkey	98M001	6.53	6530	3.81491	Mammal	M	20		47.1	0.424628	17.8603	8957.75
Black-handed Spider Monkey	1413	5.55	5550	3.74429	Mammal	M	32		47.1	0.679406	6.39706	2473.33
Black-handed Spider Monkey	M02009	6.62	6620	3.82086	Mammal	F	16		47.1	0.339703	9.375	4685.56
Black-handed Spider Monkey	98M039	6.51	6510	3.81358	Mammal	F	19		47.1	0.403397	3.41912	2856.11
Sprague-Dawley rat	Rat 6	0.28	280	2.44716	Mammal	F	0.6		4.2	0.142857	185.454	14063.7
Striped Skunk	Brie	2.63	2630	3.41996	Mammal	FS	4		13.9	0.28777	36.2647	19339.4
Striped Skunk	Oley	2.67	2670	3.42651	Mammal	MN	9.5		13.9	0.683453	19.1471
Virginia opossum	Pipsqueak	4.65	4650	3.66745	Mammal	MN	3		6.6	0.454545	72.0147	13956.7
Red-necked (bennett's) Wallaby	#2264	15.2	15200	4.18184	Mammal	Male	9	2009-06-01	15.2	0.592105	57.5735	6349.33
Red-necked (bennett's) Wallaby	#2265	10.9	10900	4.03743	Mammal	Female	9	2009-10-01	15.2	0.592105	94.1912	8258.22
Red-necked (bennett's) Wallaby	#2608	16.35	16350	4.21352	Mammal	Male	6	2012-02-01	15.2	0.394737	34.875	608
Red-necked (bennett's) Wallaby	#2787	11.6	11600	4.06446	Mammal	Female	4	2014-09-30	15.2	0.263158	71.5368	6673.78
Red-necked (bennett's) Wallaby	#3143	11.3	11300	4.05308	Mammal	Female	5	2013-10-07	15.2	0.328947	32.4265	5880
Red-necked (bennett's) Wallaby	#3144	9.3	9300	3.96848	Mammal	Female	2	2016-09-07	15.2	0.131579	38.4118	10571.6
Western lowland Gorilla	1959	41	41000	4.61278	Mammal	male	6	2012-08-31	60.1	0.0998336	43.3529	8810.34
Western lowland Gorilla	2068	163	163000	5.21219	Mammal	male	35	1983-10-26	60.1	0.582363	36.875	4072.56
Western lowland Gorilla	2069	87.3	87300	4.94101	Mammal	male	9	2009-07-27	60.1	0.14975	34.9559	9254.79
Western lowland Gorilla	2070	106.8	106800	5.02857	Mammal	female	44	1974-08-16	60.1	0.732113	30.9853	5023.67
Bushdog	13200	6.5	6500	3.81291	Mammal		10.25		14.1	0.72695	17.7647	2352.22
Gray wolf	14095	31	31000	4.49136	Mammal	F	3.4167		20.6	0.165859	21.5074	968.333
Maned wolf	103556	23.1293	23129.3	4.36416	Mammal	F	2		16.8	0.119048	27.6397	1573.33
Maned wolf	103557	23.356	23356	4.3684	Mammal	F	2		16.8	0.119048	25.75	1388.89
Maned wolf	103457	16.78	16780	4.22479	Mammal	F	7		16.8	0.416667	2.97794	770
Maned wolf	511108	27.8	27800	4.44404	Mammal	F	6.916		16.8	0.411667	7.19118	344.444
Maned wolf	511107	27.85	27850	4.44483	Mammal	M	6.66		16.8	0.396429	60.6471	1561.67
Maned wolf	517158	29.5	29500	4.46982	Mammal	F	8.416		16.8	0.500952	38.5368	3224.44
African wild dog	102118	30.4	30400	4.48287	Mammal	F	1.916		17	0.112706	13.1765	1023.89
African wild dog	102218	27.6	27600	4.44091	Mammal	M	1.916		17	0.112706	18.1397	2875
African wild dog	102318	30.4	30400	4.48287	Mammal	F	1.916		17	0.112706	12.9265	962.778
Coyote	1200	13.3	13300	4.12385	Mammal	F	7		21.8	0.321101	15.2574	9755.56
Coyote	1213	16.2	16200	4.20952	Mammal	M	7		21.8	0.321101	52.2721	12330.3
Coyote	1221	16.1	16100	4.20683	Mammal	M	7		21.8	0.321101	49.2647	12467.4
Coyote	1250	12.9	12900	4.11059	Mammal	F	7		21.8	0.321101	18.2132	10410.6
Coyote	1331	16.5	16500	4.21748	Mammal	M	6		21.8	0.275229	12.3456	9937.78
Coyote	1351	17.3	17300	4.23805	Mammal	M	6		21.8	0.275229	46.5588	10248.9
Coyote	1360	12	12000	4.07918	Mammal	F	6		21.8	0.275229	27.2426	9885.16
Coyote	1370	16	16000	4.20412	Mammal	F	6		21.8	0.275229	14.7426	7872.22
Coyote	1405	16.3	16300	4.21219	Mammal	M	5		21.8	0.229358	50.7206
Coyote	1425	14.2	14200	4.15229	Mammal	M	5		21.8	0.229358	46.4706	7024.41
Coyote	1440	14.6	14600	4.16435	Mammal	F	5		21.8	0.229358	51.0441	7042.19
Coyote	1500	14.5	14500	4.16137	Mammal	F	4		21.8	0.183486	32.8235	10057
Coyote	1601	18.3	18300	4.26245	Mammal	M	3		21.8	0.137615	53.8897	5214.04
Coyote	1611	14.7	14700	4.16732	Mammal	M	3		21.8	0.137615	13.7279	3859.44
Coyote	1615	16.1	16100	4.20683	Mammal	M	3		21.8	0.137615		4579.44
Coyote	1620	11.4	11400	4.0569	Mammal	F	3		21.8	0.137615	38.4632	16162.9
Coyote	1622	12	12000	4.07918	Mammal	F	3		21.8	0.137615	51.0147	9024.42
Coyote	1701	17.1	17100	4.233	Mammal	M	2		21.8	0.0917431		9587.22
Coyote	1803	16.4	16400	4.21484	Mammal	M	1		21.8	0.0458716	55.8529	11437.7
Coyote	1821	16.1	16100	4.20683	Mammal	M	1		21.8	0.0458716	16.8015	7242.22
Coyote	1850	13.8	13800	4.13988	Mammal	F	1		21.8	0.0458716		20934.8
Coyote	1860	12.8	12800	4.10721	Mammal	F	1		21.8	0.0458716	91.9706	9442.93
Coyote	15302	9	9000	3.95424	Mammal	M	0.33		21.8	0.0151376	8.80147	2204.44
Coyote	15303	9.08	9080	3.95809	Mammal	M	0.33		21.8	0.0151376	20.5441	2352.78
Coyote	15304	8	8000	3.90309	Mammal	F	0.33		21.8	0.0151376	13.0956	5523.89
Coyote	Smokey	11.8	11800	4.07188	Mammal	M	15.33		21.8	0.703211	2.39706	3488.89
New guinea singing dog	511054	11.5	11500	4.0607	Mammal	M	6.333				3.11765	1007.78
Dhole	13381	17.69	17690	4.24773	Mammal		7		16.1	0.434783	11.1324	1986.11
										Average	39.3188	6259.75
										SEM	2.48919	367.218
