# Supplementary material
Source: publisher figshare collection journal article supplement (https://brill.figshare.com/articles/dataset/_/20035883)
Supplement: Supplementary file 1 [file 1]

**RA:** *M.R. Wynkoop et al.*

**DOI:** 10.1163/15707563-bja10087

*Animal Biology*

*Short Note*

## **Plasma lactate dehydrogenase and pyruvate kinase activity changes with body mass and age across birds and mammals**

**Morgan R. Wynkoop<sup>1</sup>, Clara M. Cooper-Mullin<sup>2</sup> and Ana Gabriela Jimenez<sup>1,\*</sup>**

<sup>1</sup> Colgate University, Department of Biology, 13 Oak Dr., Hamilton, NY 13346, USA

<sup>2</sup> University of Rhode Island, Natural Resources Science, 1 Greenhouse Drive, Kingston, RI 02881, USA

\*Corresponding author; e-mail: [ajimenez@colgate.edu](mailto:ajimenez@colgate.edu)

ORCID iD: Jimenez: 0000-0001-9586-2866

**Supplementary material**

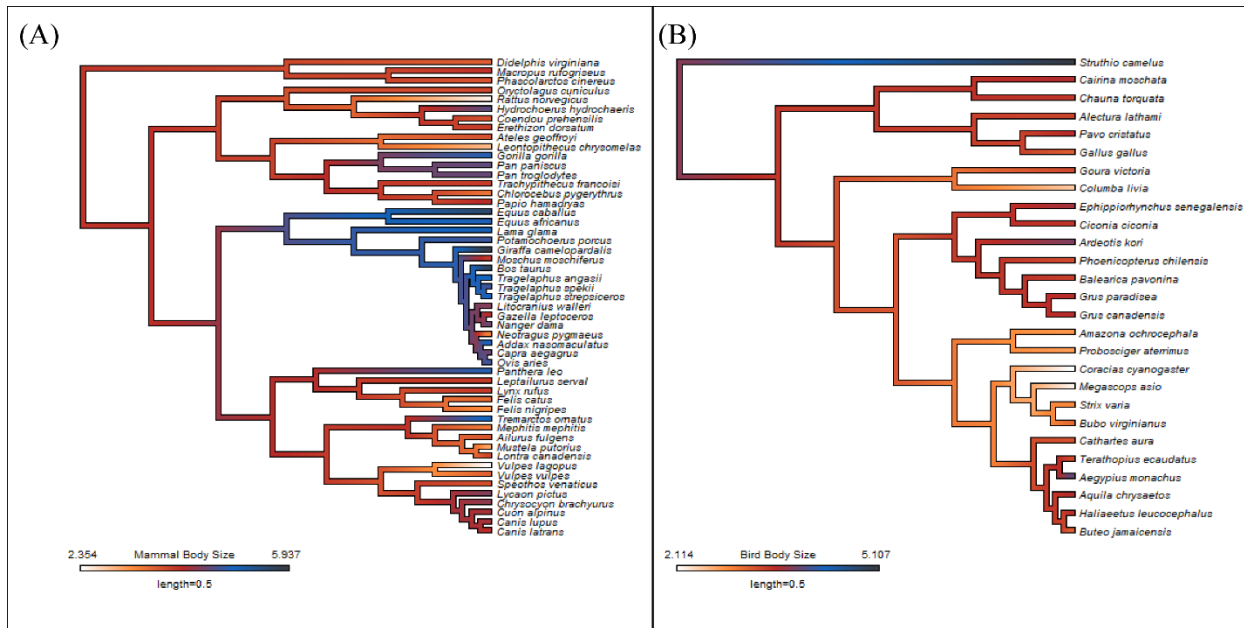

**Figure S1.** Phylogenetic trees for mammals (A) and birds (B) constructed from 1000 trees extracted from the supertree project ([www.vertlife.org](http://www.vertlife.org)). Trait values for log-transformed body size are mapped onto the tree. Darker colors indicate larger body size of a given species.

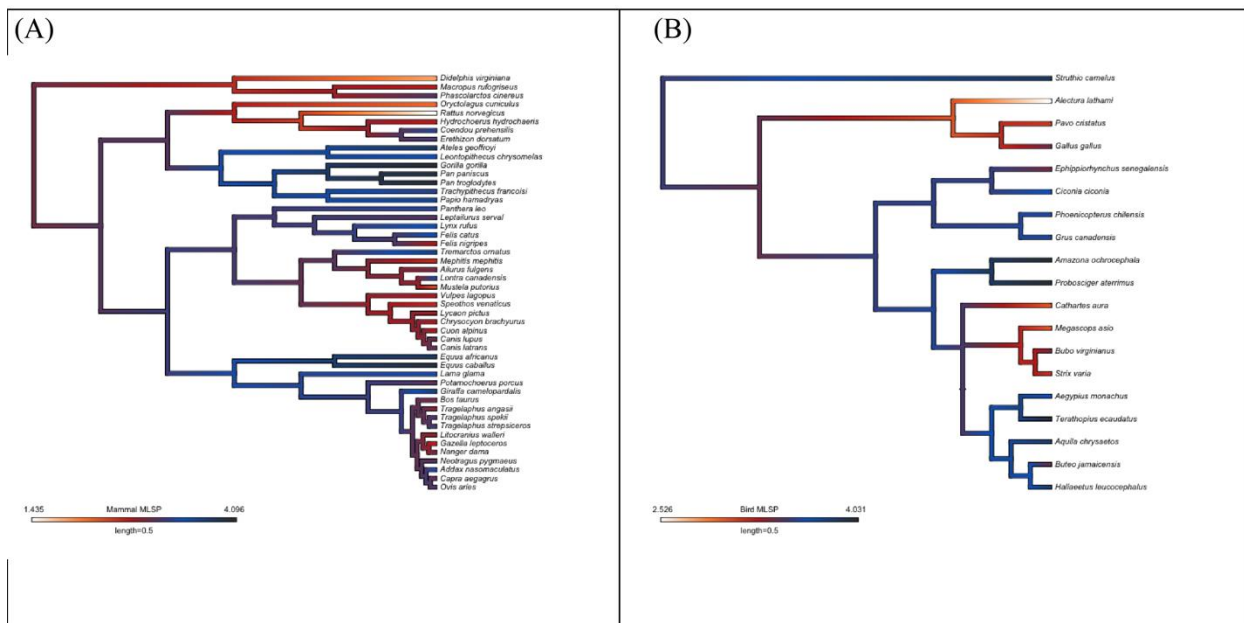

**Figure S2.** Phylogenetic trees for mammals (A) and birds (B) constructed from 1000 trees extracted from the supertree project ([www.vertlife.org](http://www.vertlife.org)). Trait values for log-transformed maximum lifespan (MLSP) are mapped onto the tree. Darker colors indicate larger values for a given species.

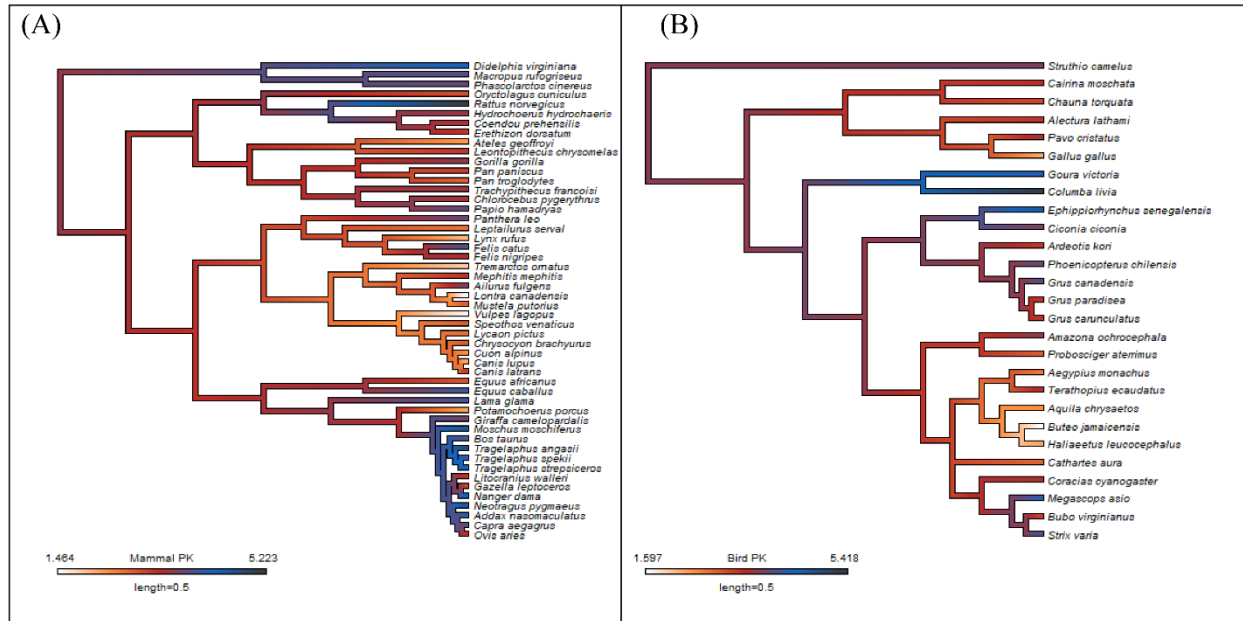

**Figure S3.** Phylogenetic trees for mammals (A) and birds (B) constructed from 1000 trees extracted from the supertree project ([www.vertlife.org](http://www.vertlife.org)). Trait values for log-transformed pyruvate kinase (PK) are mapped onto the tree. Darker colors indicate higher PK values for a given species.

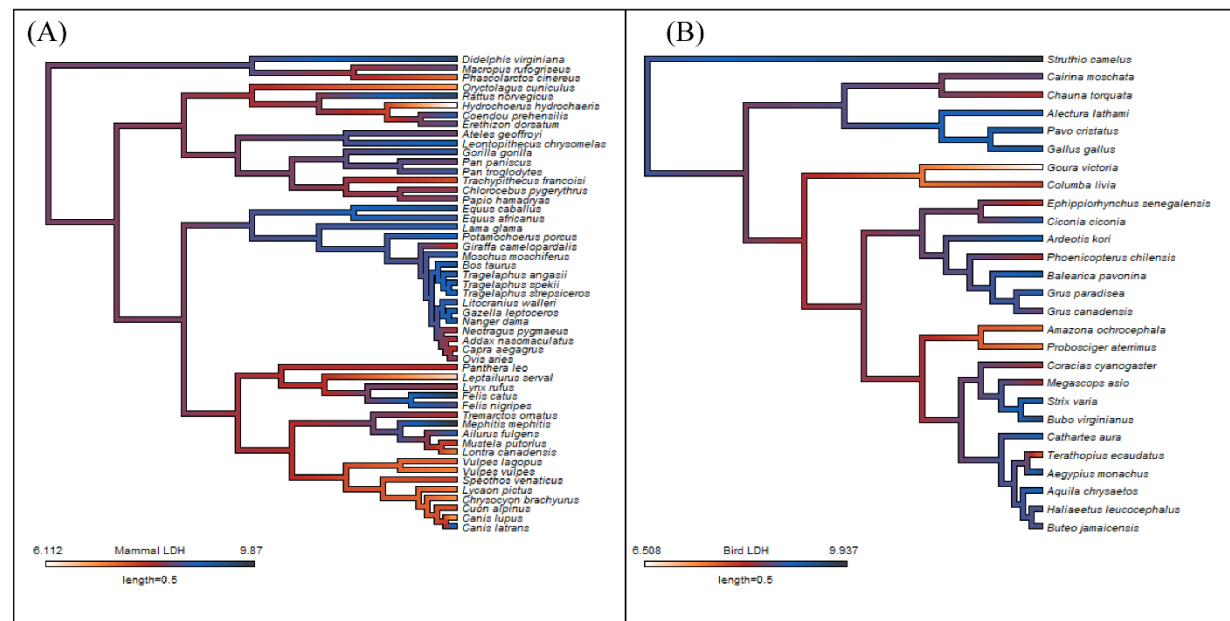

**Figure S4.** Phylogenetic trees for mammals (A) and birds (B) constructed from 1000 trees extracted from the supertree project ([www.vertlife.org](http://www.vertlife.org)). Trait values for log-transformed lactate dehydrogenase (LDH) are mapped onto the tree. Darker colors indicate higher LDH values for a given species.

**Table S1.**

Species scientific and common name as well as sample sizes per individual.

| Species                              | Common name                  | PK sample size | LDH sample size |
|--------------------------------------|------------------------------|----------------|-----------------|
| Birds                                |                              |                |                 |
| <i>Amazona ochrocephala</i>          | Yellow-crowned Amazon parrot | 1              | 1               |
| <i>Haliaeetus leucocephalus</i>      | Bald eagle                   | 4              | 5               |
| <i>Strix varia</i>                   | Barred owl                   | 1              | 1               |
| <i>Terathopus ecaudatus</i>          | Bateleur eagle               | 1              | 1               |
| <i>Coracias cyanogaster</i>          | Blue-bellied roller          | 1              | 1               |
| <i>Alectura lathami</i>              | Brushturkey                  | 1              | 1               |
| <i>Phoenicopterus chilensis</i>      | Chilean flamingo             | 9              | 7               |
| <i>Aegypius monachus</i>             | Cinereous vulture            | 1              | 1               |
| <i>Pavo cristatus</i>                | Common peafowl               | 2              | 2               |
| <i>Gallus gallus</i>                 | Domestic rooster             | 1              | 1               |
| <i>Megascops asio</i>                | Eastern screech owl          | 2              | 2               |
| <i>Aquila chrysaetos</i>             | Golden eagle                 | 1              | 1               |
| <i>Bubo virginianus</i>              | Great horned owl             | 2              | 2               |
| <i>Ardeotis kori</i>                 | Kori bustard                 | 1              | 1               |
| <i>Cairina moschata</i>              | Muscovy duck                 | 1              | 1               |
| <i>Struthio camelus</i>              | Ostrich                      | 3              | 3               |
| <i>Probosciger aterrimus</i>         | Palm cockatoo                | 1              | 1               |
| <i>Buteo jamaicensis</i>             | Red-tailed hawk              | 2              | 2               |
| <i>Columba livia</i>                 | Rock pigeon                  | 3              | 3               |
| <i>Ephippiorhynchus senegalensis</i> | Saddle-billed stork          | 2              | 2               |
| <i>Antigone canadensis</i>           | Sandhill crane               | 1              | 1               |
| <i>Chauna torquata</i>               | Southern screamer            | 1              | 1               |
| <i>Anthropoides paradiseus</i>       | Stanley blue crane           | 1              | 1               |
| <i>Cathartes aura</i>                | Turkey vulture               | 1              | 1               |
| <i>Goura victoria</i>                | Victoria crowned pigeon      | 2              | 2               |
| <i>Grus carunculata</i>              | Wattled crane                | 1              | 0               |
| <i>Balearica pavonina</i>            | West-African crowned crane   | 0              | 1               |
| <i>Ciconia ciconia</i>               | White stork                  | 2              | 2               |
| Mammals                              |                              |                |                 |

|                                   |                                |   |   |
|-----------------------------------|--------------------------------|---|---|
| <i>Addax nasomaculatus</i>        | Addax                          | 2 | 3 |
| <i>Nanger dama</i>                | Addra gazelle                  | 1 | 1 |
| <i>Panthera leo</i>               | African lion                   | 4 | 4 |
| <i>Vulpes lagopus</i>             | Arctic fox                     | 2 | 2 |
| <i>Felis nigripes</i>             | Black-footed cat               | 2 | 2 |
| <i>Lynx rufus</i>                 | Bobcat                         | 3 | 3 |
| <i>Pan paniscus</i>               | Bonobo                         | 2 | 2 |
| <i>Hydrochoerus hydrochaeris</i>  | Capybara                       | 1 | 1 |
| <i>Pan troglodytes</i>            | Chimpanzee                     | 4 | 4 |
| <i>Felis catus</i>                | Domestic cat                   | 5 | 5 |
| <i>Mustela putorius</i>           | European polecat               | 1 | 1 |
| <i>Equus asinus</i>               | Donkey                         | 4 | 4 |
| <i>Oryctolagus cuniculus</i>      | Flemish giant rabbit           | 1 | 1 |
| <i>Trachypithecus francoisi</i>   | Francois' langur               | 2 | 2 |
| <i>Giraffa camelopardalis</i>     | Giraffe                        | 2 | 2 |
| <i>Capra aegagrus</i>             | Goat                           | 8 | 8 |
| <i>Leontopithecus chrysomelas</i> | Golden-headed lion tamarin     | 2 | 2 |
| <i>Tragelaphus strepsiceros</i>   | Greater kudu                   | 2 | 3 |
| <i>Papio hamadryas</i>            | Hamadryas baboon               | 5 | 6 |
| <i>Bos taurus</i>                 | Holstein cow                   | 1 | 1 |
| <i>Equus caballus</i>             | Horse                          | 2 | 2 |
| <i>Ovis aries</i>                 | Jacob sheep                    | 4 | 4 |
| <i>Phascolarctos cinereus</i>     | Koala                          | 1 | 1 |
| <i>Lama glama</i>                 | Llama                          | 2 | 2 |
| <i>Erethizon dorsatum</i>         | North-American porcupine       | 1 | 1 |
| <i>Lontra canadensis</i>          | North-American river otter     | 3 | 3 |
| <i>Tragelaphus angasii</i>        | Nyala                          | 1 | 1 |
| <i>Coendou prehensilis</i>        | Prehensile-tailed porcupine    | 2 | 1 |
| <i>Vulpes vulpes</i>              | Red fox                        | 1 | 0 |
| <i>Ailurus fulgens</i>            | Red panda                      | 4 | 5 |
| <i>Potamochoerus porcus</i>       | Red river hog                  | 4 | 4 |
| <i>Notamacropus rufogriseus</i>   | Red-necked (Bennett's) wallaby | 6 | 6 |
| <i>Neotragus pygmaeus</i>         | Royal antelope                 | 1 | 1 |
| <i>Leptailurus serval</i>         | Serval                         | 1 | 1 |

|                                |                             |    |    |
|--------------------------------|-----------------------------|----|----|
| <i>Moschus moschiferus</i>     | Siberian musk deer          | 1  | 1  |
| <i>Tragelaphus spekii</i>      | Sitatunga                   | 4  | 4  |
| <i>Gazella leptoceros</i>      | Slender-horned gazelle      | 1  | 1  |
| <i>Chlorocebus pygerythrus</i> | South-African vervet monkey | 1  | 1  |
| <i>Litocranius walleri</i>     | Southern gerenuk            | 1  | 1  |
| <i>Tremarctos ornatus</i>      | Spectacled bear             | 1  | 1  |
| <i>Rattus norvegicus</i>       | Sprague–Dawley rat          | 1  | 1  |
| <i>Mephitis mephitis</i>       | Striped skunk               | 2  | 1  |
| <i>Didelphis virginiana</i>    | Virginia opossum            | 1  | 1  |
| <i>Gorilla gorilla</i>         | Western lowland gorilla     | 4  | 4  |
| <i>Ateles geoffroyi</i>        | Black-handed spider monkey  | 5  | 6  |
| <i>Speothos venaticus</i>      | Bushdog                     | 1  | 1  |
| <i>Canis lupus</i>             | Gray wolf                   | 1  | 1  |
| <i>Chrysocyon brachyurus</i>   | Maned wolf                  | 6  | 6  |
| <i>Lycaon pictus</i>           | African wild dog            | 3  | 3  |
| <i>Canis latrans</i>           | Coyote                      | 23 | 25 |
| <i>Canis dingo hallstromi</i>  | New Guinea singing dog      | 1  | 1  |
| <i>Cuon alpinus</i>            | Dhole                       | 1  | 1  |

LDH, lactate dehydrogenase; PK, pyruvate kinase.

**Table S2.**

Demographic information per individual, including body mass, sex, age and MLSP.

| Species                         | Body mass<br>(kg) | Bird or<br>mammal? | Sex | Age<br>(years) | DOB | MLSP<br>(years) | Age/MLSP    |
|---------------------------------|-------------------|--------------------|-----|----------------|-----|-----------------|-------------|
| Yellow-crowned<br>Amazon parrot | 0.63              | Bird               | MI  | 39             |     | 56              | 0.696428571 |
| Bald eagle                      | 4.04              | Bird               | FI  | 18             |     | 48              | 0.375       |
| Bald eagle                      | 4.69              | Bird               | FI  | 7              |     | 48              | 0.145833333 |
| Bald eagle                      | 4.28              | Bird               | FI  | 7              |     | 48              | 0.145833333 |
| Bald eagle                      | 3.58              | Bird               | MI  | 7              |     | 48              | 0.145833333 |
| Bald eagle                      | 3.05              | Bird               | MI  | 15             |     | 48              | 0.3125      |
| Barred owl                      | 0.838             | Bird               | U   | 6              |     | 24              | 0.25        |
| Bateleur eagle                  | 2.42              | Bird               | F   |                |     | 55              |             |
| Blue-bellied roller             | 0.13              | Bird               | F   | 1              |     |                 |             |
| Brushturkey                     | 2.68              | Bird               | M   | 12             |     | 12.5            | 0.96        |
| Chilean flamingo                | 2.6               | Bird               | FI  | 19             |     | 36.7            | 0.517711172 |

|                     |       |      |    |      |                |      |             |
|---------------------|-------|------|----|------|----------------|------|-------------|
| Chilean flamingo    | 2.95  | Bird | MI | 19   |                | 36.7 | 0.517711172 |
| Chilean flamingo    | 1.9   | Bird | M  | 46   | 1972           | 36.7 | 1.253405995 |
| Chilean flamingo    | 2.95  | Bird | M  | 37   | 1981           | 36.7 | 1.008174387 |
| Chilean flamingo    | 1.9   | Bird | F  | 37   | 1981           | 36.7 | 1.008174387 |
| Chilean flamingo    | 2.45  | Bird | F  | 23   | 1995           | 36.7 | 0.626702997 |
| Chilean flamingo    | 2.55  | Bird | M  | 12   | 2006           | 36.7 | 0.326975477 |
| Chilean flamingo    | 3.25  | Bird | M  | 31   | 1987           | 36.7 | 0.844686649 |
| Chilean flamingo    | 2.45  | Bird | F  | 31   | 1987           | 36.7 | 0.844686649 |
| Cinereous vulture   | 9.84  | Bird | F  | 29   |                | 39   | 0.743589744 |
| Common peafowl      | 4.5   | Bird | M  | 5    | 01/06/<br>2013 | 23.2 | 0.215517241 |
| Common peafowl      | 4     | Bird | M  | 5    | 01/06/<br>2013 | 23.2 | 0.215517241 |
| Domestic rooster    | 1.7   | Bird | MI | 5    |                | 30   | 0.166666667 |
| Eastern screech owl | 0.151 | Bird | F  | 12   |                | 20.7 | 0.579710145 |
| Eastern screech owl | 0.165 | Bird | MI | 3    |                | 20.7 | 0.144927536 |
| Golden eagle        | 4.5   | Bird | FI | 12   |                | 48   | 0.25        |
| Great horned owl    | 1.4   | Bird | MI | 7.5  |                | 29   | 0.25862069  |
| Great horned owl    | 1.35  | Bird | FI | 8.5  |                | 29   | 0.293103448 |
| Kori bustard        | 7.5   | Bird | F  | 9    | 05/08/<br>2009 |      |             |
| Muscovy duck        | 4.51  | Bird | MI | 10   |                |      |             |
| Ostrich             | 136.3 | Bird | F  | 17   | 22/07/<br>2001 | 50   | 0.34        |
| Ostrich             | 128.2 | Bird | F  | 17   | 22/07/<br>2001 | 50   | 0.34        |
| Ostrich             | 120   | Bird | F  | 16   | 15/07/<br>2002 | 50   | 0.32        |
| Palm cockatoo       | 0.569 | Bird | F  | 12   | 07/06/<br>2006 | 56.3 | 0.213143872 |
| Red-tailed hawk     | 1.74  | Bird | FI | 14.5 |                | 30.7 | 0.472312704 |
| Red-tailed hawk     | 1.6   | Bird | FI | 7.5  |                | 30.7 | 0.244299674 |
| Saddlebill stork    | 4.25  | Bird | F  | 24   | 1994           | 30.2 | 0.794701987 |
| Saddlebill stork    | 6.3   | Bird | M  | 11   | 2007           | 30.2 | 0.364238411 |
| Sandhill crane      | 4.34  | Bird | M  | 10   |                | 36.6 | 0.273224044 |
| Southern screamer   | 3.35  | Bird | M  | 4    | 11/04/<br>2014 |      |             |

|                               |       |        |     |    |                |      |             |
|-------------------------------|-------|--------|-----|----|----------------|------|-------------|
| Stanley blue crane            | 4.32  | Bird   | F   | 8  |                |      |             |
| Turkey vulture                | 2.04  | Bird   | FI  | 13 |                | 20.8 | 0.625       |
| Victoria crowned<br>pigeon    | 2.94  | Bird   | M   | 14 |                |      |             |
| Victoria crowned<br>pigeon    | 2.01  | Bird   | F   | 19 |                |      |             |
| Wattled crane                 | 6.7   | Bird   | M   | 35 | 28/05/<br>1983 |      |             |
| West African crowned<br>crane | 2.9   | Bird   | F   | 10 |                |      |             |
| White stork                   | 3.06  | Bird   | F   | 25 |                | 39   | 0.641025641 |
| White stork                   | 3.86  | Bird   | M   | 20 |                | 39   | 0.512820513 |
| Rock pigeon                   | 0.301 | Bird   | n/a |    |                |      |             |
| Rock pigeon                   | 0.336 | Bird   | n/a |    |                |      |             |
| Rock pigeon                   | 0.265 | Bird   | n/a |    |                |      |             |
| Addax                         | 125   | Mammal | F   | 13 | 21/05/<br>2005 | 28   | 0.464285714 |
| Addax                         | 120   | Mammal | F   | 8  | 16/06/<br>2010 | 28   | 0.285714286 |
| Addax                         | 110   | Mammal | F   | 2  | 17/05/<br>2016 | 28   | 0.071428571 |
| Addra gazelle                 | 40    | Mammal | F   | 3  | 12/04/<br>2015 | 19.3 | 0.155440415 |
| African lion                  | 178   | Mammal | F   | 8  | 31/08/<br>2010 | 27   | 0.296296296 |
| African lion                  | 11.1  | Mammal | M   | 1  | 14/11/<br>2017 | 27   | 0.037037037 |
| African lion                  | 212.3 | Mammal | M   | 1  | 18/12/<br>2018 | 27   | 0.037037037 |
| African lion                  | 161.9 | Mammal | F   | 8  | 31/08/<br>2010 | 27   | 0.296296296 |
| Arctic fox                    | 5.9   | Mammal | M   | 7  | 13/05/<br>2011 | 16.3 | 0.429447853 |
| Arctic fox                    | 4.5   | Mammal | F   |    |                | 16.3 |             |
| Black-footed cat              | 1.92  | Mammal | M   | 8  |                | 15.6 | 0.512820513 |
| Black-footed cat              | 1.67  | Mammal | F   | 11 |                | 15.6 | 0.705128205 |
| Bobcat                        | 12.3  | Mammal | MI  | 10 |                | 32.3 | 0.309597523 |



|                        |       |        |    |      |        |      |             |
|------------------------|-------|--------|----|------|--------|------|-------------|
| Bobcat                 | 9.91  | Mammal | FS | 12   |        | 32.3 | 0.371517028 |
| Bobcat                 | 8.9   | Mammal |    | 13   |        | 32.3 | 0.40247678  |
| Bonobo                 | 37.5  | Mammal | F  | 44   | 22/01/ | 55   | 0.8         |
|                        |       |        |    |      | 1974   |      |             |
| Bonobo                 | 49.5  | Mammal | M  | 27   | 23/12/ | 55   | 0.490909091 |
|                        |       |        |    |      | 1991   |      |             |
| Capybara               | 45.5  | Mammal | F  | 10   | 01/01/ | 15.1 | 0.662251656 |
|                        |       |        |    |      | 2008   |      |             |
| Chimp                  | 50    | Mammal | F  | 35   | 24/12/ | 59.4 | 0.589225589 |
|                        |       |        |    |      | 1983   |      |             |
| Chimp                  | 52.3  | Mammal | F  | 22   | 16/12/ | 59.4 | 0.37037037  |
|                        |       |        |    |      | 1996   |      |             |
| Chimp                  | 32.7  | Mammal | F  | 6    | 16/01/ | 59.4 | 0.101010101 |
|                        |       |        |    |      | 2012   |      |             |
| Chimp                  | 31    | Mammal | F  | 7    | 17/04/ | 59.4 | 0.117845118 |
|                        |       |        |    |      | 2011   |      |             |
| Domestic cat           | 3.24  | Mammal | F  | 4    |        | 30   | 0.133333333 |
| Domestic cat           | 5.625 | Mammal | M  | 3    |        | 30   | 0.1         |
| Domestic cat           | 4.05  | Mammal | M  | 5.5  |        | 30   | 0.183333333 |
| Domestic cat           | 3.15  | Mammal | F  | 4    |        | 39   | 0.102564103 |
| Domestic cat           | 3.15  | Mammal | F  | 1    |        | 30   | 0.033333333 |
| Domestic ferret        | 1.075 | Mammal | MN | 5    |        | 11.1 | 0.45045045  |
| Donkey                 | 113.4 | Mammal | M  |      |        | 47   |             |
| Donkey                 | 58.96 | Mammal | M  | 1    | 08/201 | 47   | 0.021276596 |
|                        |       |        |    |      | 17     |      |             |
| Donkey                 | 88.9  | Mammal | M  | 3    | 07/201 | 47   | 0.063829787 |
|                        |       |        |    |      | 5      |      |             |
| Miniature donkey       | 134   | Mammal | FI | 18.5 |        | 47   | 0.393617021 |
| Flemish giant rabbit   | 7.5   | Mammal | MN | 4.5  |        | 9    | 0.5         |
| Francois' langur       | 10.04 | Mammal | F  | 16   | 02/09/ | 26.3 | 0.608365019 |
|                        |       |        |    |      | 2002   |      |             |
| Francois' langur       | 8.94  | Mammal | F  | 6    | 03/11/ | 26.3 | 0.228136882 |
|                        |       |        |    |      | 2012   |      |             |
| Slender-horned gazelle | 13.6  | Mammal | F  | 7    | 28/04/ | 14.6 | 0.479452055 |
|                        |       |        |    |      | 2011   |      |             |
| Giraffe                | 700   | Mammal | F  | 21   | 24/08/ | 39.5 | 0.53164557  |
|                        |       |        |    |      | 1997   |      |             |

|                            |       |        |    |     |            |      |             |
|----------------------------|-------|--------|----|-----|------------|------|-------------|
| Giraffe                    | 1067  | Mammal | M  | 12  |            | 39.5 | 0.303797468 |
| Goat                       | 43    | Mammal | M  | 8   | 20/05/2010 | 20.8 | 0.384615385 |
| Goat                       | 40    | Mammal | F  | 11  | 17/08/2007 | 20.8 | 0.528846154 |
| Goat                       | 32.85 | Mammal | F  | 5   | 24/04/2013 | 20.8 | 0.240384615 |
| Goat                       | 38    | Mammal | F  | 5   | 24/04/2013 | 20.8 | 0.240384615 |
| Goat                       | 30.5  | Mammal | F  | 4   | 24/04/2014 | 20.8 | 0.192307692 |
| Goat                       | 25    | Mammal | F  | 2   | 27/04/2016 | 20.8 | 0.096153846 |
| Pygmy goat                 | 31.6  | Mammal | FI | 5.5 |            | 20.8 | 0.264423077 |
| Pygmy goat                 | 30    | Mammal | F  | 12  |            | 20.8 | 0.576923077 |
| Golden headed lion tamarin | 0.78  | Mammal | M  | 17  | 18/11/2001 | 31.6 | 0.537974684 |
| Golden headed lion tamarin | 0.79  | Mammal | F  | 6   | 22/11/2012 | 31.6 | 0.189873418 |
| Greater kudu               | 150   | Mammal | F  | 2   | 07/09/2016 | 23.5 | 0.085106383 |
| Greater kudu               | 130   | Mammal | M  | 2   | 14/10/2016 | 23.5 | 0.085106383 |
| Greater kudu               | 70    | Mammal | M  | 1   | 11/10/2017 | 23.5 | 0.042553191 |
| Hamadryas baboon           | 28    | Mammal | M  | 20  | 20/10/1998 | 37.5 | 0.533333333 |
| Hamadryas baboon           | 16.5  | Mammal | F  | 14  | 13/09/2004 | 37.5 | 0.373333333 |
| Hamadryas baboon           | 29.5  | Mammal | M  | 13  | 08/10/2005 | 37.5 | 0.346666667 |
| Hamadryas baboon           | 13    | Mammal | F  | 8   | 01/10/2010 | 37.5 | 0.213333333 |
| Hamadryas baboon           | 12    | Mammal | M  | 5   | 21/05/2013 | 37.5 | 0.133333333 |
| Hamadryas baboon           | 6     | Mammal | M  | 3   | 25/09/2015 | 37.5 | 0.08        |

|                                |        |        |    |     |                |      |             |
|--------------------------------|--------|--------|----|-----|----------------|------|-------------|
| Holstein cow                   | 635    | Mammal | F  | 5   |                | 20   | 0.25        |
| Horse                          | 453.59 | Mammal | M  | 10  | 2008           | 57   | 0.175438596 |
| Horse                          | 453.59 | Mammal | M  | 12  | 2006           | 57   | 0.210526316 |
| Jacob sheep                    | 71.27  | Mammal | MN | 9   |                | 22.8 | 0.394736842 |
| Jacob sheep                    | 66.32  | Mammal | MN | 7   |                | 22.8 | 0.307017544 |
| Jacob sheep                    | 84.86  | Mammal | MN | 8   |                | 22.8 | 0.350877193 |
| Jacob sheep                    | 72.7   | Mammal | MN | 7.5 |                | 22.8 | 0.328947368 |
| Koala                          | 5.76   | Mammal | F  | 10  | 24/03/<br>2008 | 22.1 | 0.452488688 |
| Llama                          | 145    | Mammal | F  | 17  | 13/05/<br>2001 | 28.9 | 0.588235294 |
| Llama                          | 127.5  | Mammal | F  | 8   | 01/07/<br>2010 | 28.9 | 0.276816609 |
| North-American<br>porcupine    | 10.05  | Mammal | FI | 3   |                | 23.4 | 0.128205128 |
| North-American river<br>otter  | 8.6    | Mammal | MI | 13  |                | 27   | 0.481481481 |
| North-American river<br>otter  | 10.13  | Mammal | M  | 9   |                | 27   | 0.333333333 |
| North-American river<br>otter  | 7      | Mammal |    | 9   |                | 27   | 0.333333333 |
| North-American river<br>otter  | 9.4    | Mammal | M  | 12  | 01/03/<br>2006 | 27   | 0.444444444 |
| Nyala                          | 118    | Mammal | M  | 10  | 08/07/<br>2008 | 18.5 | 0.540540541 |
| Prehensile Tailed<br>porcupine | 5.9    | Mammal | FS | 8   |                | 26.6 | 0.30075188  |
| Prehensile tailed<br>porcupine | 6.86   | Mammal | MI | 8.5 |                | 26.6 | 0.319548872 |
| Red fox                        | 4.7    | Mammal | F  | 3   | 15/02/<br>2015 | 21.3 | 0.14084507  |
| Red panda                      | 5.05   | Mammal | FI | 9.5 |                | 19   | 0.5         |
| Red panda                      | 5.45   | Mammal | MI | 3.5 |                | 19   | 0.184210526 |
| Red panda                      | 4.26   | Mammal | F  | 4   |                | 19   | 0.210526316 |
| Red panda                      | 6.34   | Mammal | F  | 4   |                | 19   | 0.210526316 |
| Red panda                      | 6.88   | Mammal | F  | 5   | 16/02/<br>2013 | 19   | 0.263157895 |

|                             |       |        |   |    |            |      |             |
|-----------------------------|-------|--------|---|----|------------|------|-------------|
| Red river hog               | 79    | Mammal | F | 11 |            | 22   | 0.5         |
| Red river hog               | 63    | Mammal | F | 11 |            | 22   | 0.5         |
| Red river hog               | 60    | Mammal | F | 14 | 18/10/2004 | 22   | 0.636363636 |
| Red river hog               | 70    | Mammal | M | 18 | 06/05/2000 | 22   | 0.818181818 |
| Royal antelope              | 2     | Mammal | M |    |            | 22   |             |
| Serval                      | 10.07 | Mammal | M | 3  | 13/05/2015 | 22.4 | 0.133928571 |
| Siberian musk deer          | 10    | Mammal | M | 2  | 03/06/2016 |      |             |
| Sitatunga                   | 75    | Mammal | F | 6  | 16/04/2012 | 22.6 | 0.265486726 |
| Sitatunga                   | 50    | Mammal | F | 4  | 08/08/2014 | 22.6 | 0.17699115  |
| Sitatunga                   | 40    | Mammal | F | 4  | 08/10/2014 | 22.6 | 0.17699115  |
| Sitatunga                   | 75    | Mammal | M | 3  | 24/04/2015 | 22.6 | 0.132743363 |
| South-African vervet monkey | 3.06  | Mammal | M | 1  | 20/09/2018 |      |             |
| Southern gerenuk            | 27.6  | Mammal | M | 2  | 30/07/2016 | 17.3 | 0.115606936 |
| Spectacled bear             | 128.9 | Mammal | M | 8  | 30/12/2010 | 39   | 0.205128205 |
| Black-handed spider monkey  | 6.43  | Mammal | F | 28 |            | 47.1 | 0.59447983  |
| Black-handed spider monkey  | 6.19  | Mammal | F | 21 |            | 47.1 | 0.445859873 |
| Black-handed spider monkey  | 6.53  | Mammal | M | 20 |            | 47.1 | 0.42462845  |
| Black-handed spider monkey  | 5.55  | Mammal | M | 32 |            | 47.1 | 0.67940552  |
| Black-handed spider monkey  | 6.62  | Mammal | F | 16 |            | 47.1 | 0.33970276  |
| Black-handed spider monkey  | 6.51  | Mammal | F | 19 |            | 47.1 | 0.403397028 |

|                                   |                 |        |    |        |                |      |             |
|-----------------------------------|-----------------|--------|----|--------|----------------|------|-------------|
| Sprague–Dawley rat                | 0.28            | Mammal | F  | 0.6    |                | 4.2  | 0.142857143 |
| Striped skunk                     | 2.63            | Mammal | FS | 4      |                | 13.9 | 0.287769784 |
| Striped skunk                     | 2.67            | Mammal | MN | 9.5    |                | 13.9 | 0.683453237 |
| Virginia opossum                  | 4.65            | Mammal | MN | 3      |                | 6.6  | 0.454545455 |
| Red-necked (Bennett's)<br>wallaby | 15.2            | Mammal | M  | 9      | 01/06/<br>2009 | 15.2 | 0.592105263 |
| Red-necked (Bennett's)<br>wallaby | 10.9            | Mammal | F  | 9      | 01/10/<br>2009 | 15.2 | 0.592105263 |
| Red-necked (Bennett's)<br>wallaby | 16.35           | Mammal | M  | 6      | 01/02/<br>2012 | 15.2 | 0.394736842 |
| Red-necked (Bennett's)<br>wallaby | 11.6            | Mammal | F  | 4      | 30/09/<br>2014 | 15.2 | 0.263157895 |
| Red-necked (Bennett's)<br>wallaby | 11.3            | Mammal | F  | 5      | 07/10/<br>2013 | 15.2 | 0.328947368 |
| Red-necked (Bennett's)<br>wallaby | 9.3             | Mammal | F  | 2      | 07/09/<br>2016 | 15.2 | 0.131578947 |
| Western lowland<br>gorilla        | 41              | Mammal | M  | 6      | 31/08/<br>2012 | 60.1 | 0.099833611 |
| Western lowland<br>gorilla        | 163             | Mammal | M  | 35     | 26/10/<br>1983 | 60.1 | 0.582362729 |
| Western lowland<br>gorilla        | 87.3            | Mammal | M  | 9      | 27/07/<br>2009 | 60.1 | 0.149750416 |
| Western lowland<br>gorilla        | 106.8           | Mammal | F  | 44     | 16/08/<br>1974 | 60.1 | 0.732113145 |
| Bushdog                           | 6.5             | Mammal |    | 10.25  |                | 14.1 | 0.726950355 |
| Gray wolf                         | 31              | Mammal | F  | 3.4167 |                | 20.6 | 0.165859223 |
| Maned wolf                        | 23.129251<br>7  | Mammal | F  | 2      |                | 16.8 | 0.119047619 |
| Maned wolf                        | 23.356009<br>07 | Mammal | F  | 2      |                | 16.8 | 0.119047619 |
| Maned wolf                        | 16.780045<br>35 | Mammal | F  | 7      |                | 16.8 | 0.416666667 |
| Maned wolf                        | 27.8            | Mammal | F  | 6.916  |                | 16.8 | 0.411666667 |
| Maned wolf                        | 27.85           | Mammal | M  | 6.66   |                | 16.8 | 0.396428571 |
| Maned wolf                        | 29.5            | Mammal | F  | 8.416  |                | 16.8 | 0.500952381 |
| African wild dog                  | 30.4            | Mammal | F  | 1.916  |                | 17   | 0.112705882 |
| African wild dog                  | 27.6            | Mammal | M  | 1.916  |                | 17   | 0.112705882 |

|                           |       |        |   |       |      |             |
|---------------------------|-------|--------|---|-------|------|-------------|
| African wild dog          | 30.4  | Mammal | F | 1.916 | 17   | 0.112705882 |
| Coyote                    | 13.3  | Mammal | F | 7     | 21.8 | 0.321100917 |
| Coyote                    | 16.2  | Mammal | M | 7     | 21.8 | 0.321100917 |
| Coyote                    | 16.1  | Mammal | M | 7     | 21.8 | 0.321100917 |
| Coyote                    | 12.9  | Mammal | F | 7     | 21.8 | 0.321100917 |
| Coyote                    | 16.5  | Mammal | M | 6     | 21.8 | 0.275229358 |
| Coyote                    | 17.3  | Mammal | M | 6     | 21.8 | 0.275229358 |
| Coyote                    | 12    | Mammal | F | 6     | 21.8 | 0.275229358 |
| Coyote                    | 16    | Mammal | F | 6     | 21.8 | 0.275229358 |
| Coyote                    | 16.3  | Mammal | M | 5     | 21.8 | 0.229357798 |
| Coyote                    | 14.2  | Mammal | M | 5     | 21.8 | 0.229357798 |
| Coyote                    | 14.6  | Mammal | F | 5     | 21.8 | 0.229357798 |
| Coyote                    | 14.5  | Mammal | F | 4     | 21.8 | 0.183486239 |
| Coyote                    | 18.3  | Mammal | M | 3     | 21.8 | 0.137614679 |
| Coyote                    | 14.7  | Mammal | M | 3     | 21.8 | 0.137614679 |
| Coyote                    | 16.1  | Mammal | M | 3     | 21.8 | 0.137614679 |
| Coyote                    | 11.4  | Mammal | F | 3     | 21.8 | 0.137614679 |
| Coyote                    | 12    | Mammal | F | 3     | 21.8 | 0.137614679 |
| Coyote                    | 17.1  | Mammal | M | 2     | 21.8 | 0.091743119 |
| Coyote                    | 16.4  | Mammal | M | 1     | 21.8 | 0.04587156  |
| Coyote                    | 16.1  | Mammal | M | 1     | 21.8 | 0.04587156  |
| Coyote                    | 13.8  | Mammal | F | 1     | 21.8 | 0.04587156  |
| Coyote                    | 12.8  | Mammal | F | 1     | 21.8 | 0.04587156  |
| Coyote                    | 9     | Mammal | M | 0.33  | 21.8 | 0.015137615 |
| Coyote                    | 9.08  | Mammal | M | 0.33  | 21.8 | 0.015137615 |
| Coyote                    | 8     | Mammal | F | 0.33  | 21.8 | 0.015137615 |
| Coyote                    | 11.8  | Mammal | M | 15.33 | 21.8 | 0.703211009 |
| New Guinea singing<br>dog | 11.5  | Mammal | M | 6.333 |      |             |
| Dhole                     | 17.69 | Mammal |   | 7     | 16.1 | 0.434782609 |

DOB, date of birth; MLSP, maximum lifespan. F, female; FI, female intact ; M, male; MI, male intact; MN, male neutered; FS, female spayed ; U, unavailable.
